# Supplementary material
Source: publisher figshare collection journal article supplement (https://acs.figshare.com/ndownloader/files/4705984)

**Figure SI1:** View of the structures of compounds **6** (top) and **7** (bottom).  
NbO<sub>6</sub> – cyan, Co – yellow, N- light green, C – dark green.

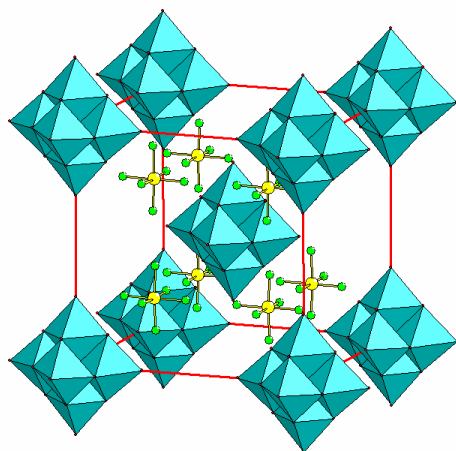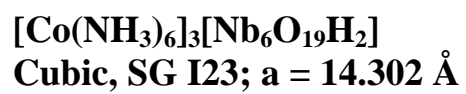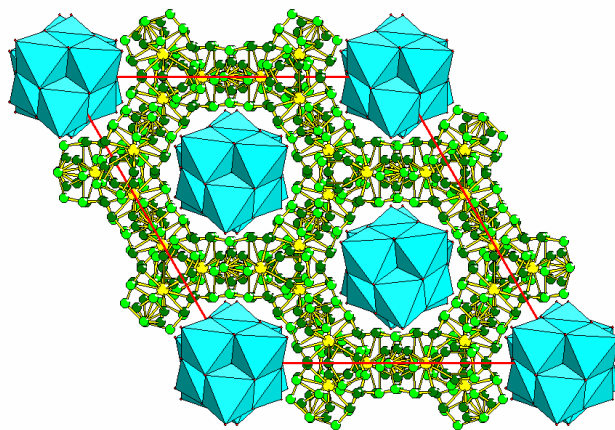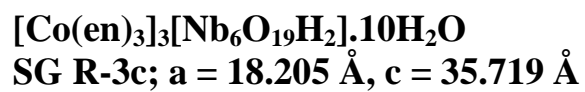

Supplement: Supplementary file 1 [file 4705984]
